# Supplementary material for: Facile UV-healable polyethylenimine–copper (C2H5N–Cu) supramolecular polymer networks
Source: Royal Society of Chemistry journal article supplement (doi:10.1039/c2py20844j), 2012-12-05
Supplement: c2py20844j.pdf [file c2py20844j.pdf]

## Supporting Online Materials

Facile UV-Repairable Polyethylenimine-Copper (C<sub>2</sub>H<sub>5</sub>N-Cu) Supramolecular Polymer Networks

Zhanhua Wang and Marek W. Urban\*

School of Polymers and High Performance Materials

Shelby F. Thames Polymer Science Research Center

The University of Southern Mississippi

Hattiesburg, MS 39406

\*To whom all correspondence should be addressed (E-mail: marek.urban@usm.edu)

### Materials and Methods

Materials: Polyethylenimine (PEI, Mn=10000, Mw=25000, repeated unit: C<sub>2</sub>H<sub>5</sub>N) and Copper sulfate pentahydrate were purchased from Sigma Aldrich Co.

Preparation of Polyethylenimine-Copper Sulfate (C<sub>2</sub>H<sub>5</sub>N-Cu) Supramolecular Polymer Networks: PEI and CuSO<sub>4</sub> water solution were prepared by dissolving PEI and CuSO<sub>4</sub> in water directly. The PEI and CuSO<sub>4</sub> solutions are colorless and blue respectively (Figure S1A-a, -b; Figure S1B-a, -b). The C<sub>2</sub>H<sub>5</sub>N-Cu solution was prepared by mixing PEI and CuSO<sub>4</sub> water solutions, while stirring at room temperature for 24 h. Upon mixing, solution color changes to dark blue, which confirms the formation of C<sub>2</sub>H<sub>5</sub>N-Cu complexes<sup>[1]</sup> (Figure S1A-c, Figure S1B-c). C<sub>2</sub>H<sub>5</sub>N-Cu supramolecular network films were prepared by casting aqueous C<sub>2</sub>H<sub>5</sub>N-Cu solution onto the glass, gold and PTFE substrates followed by drying at room temperature for 24 hrs. The final step involved drying at 50 °C for 48 hrs. Figure S2 shows a comparison of ATR-FTIR spectra of C<sub>2</sub>H<sub>5</sub>N-Cu supramolecular polymer network with PEI and CuSO<sub>4</sub>. The band at 1658 cm<sup>-1</sup> is due to associated N-H stretching vibrations, which confirms the formation of the Cu-

N coordination bond.<sup>[2]</sup> The overlapping bands at  $1093\text{ cm}^{-1}$  also confirm this behavior (Figure S2). Further evidence for  $\text{C}_2\text{H}_5\text{N-Cu}$  supramolecular network formation is shown in Raman spectra (Figure S3).  $\text{CuSO}_4$  exhibits three vibration modes (Figure S3, trace a): asymmetric stretching vibrations at 1208, 1097, 1043, and  $1019\text{ cm}^{-1}$ ; the out-of-plane bending vibrations at 666, 626, and  $607\text{ cm}^{-1}$ ; the in-plane bending vibrations at 502 and  $425\text{ cm}^{-1}$ .<sup>[3]</sup> Symmetric stretching band at  $972\text{ cm}^{-1}$  due to free sulfate is detected in the spectra of  $\text{C}_2\text{H}_5\text{N-Cu}$  supramolecular network<sup>[4]</sup> (Figure S3, trace c), demonstrating that all the  $\text{Cu}^{2+}$  ions are coordinated with N of PEI. In addition, the new band at  $458\text{ cm}^{-1}$  is attributed to Cu-N coordination bonds<sup>[2]</sup>.

Exposure to UV radiation was conducted using a 120 W fluorescent UV lamp of 302 nm wavelength of light. Each specimen was placed 5 cm from the UV source.

UV-Vis absorption spectra were measured using a Varian Cary 500 scan UV-Vis-NIR Spectrophotometer in the wavelength range from 190 nm to 1100 nm. In a typical test for solution, PEI,  $\text{CuSO}_4$  and  $\text{C}_2\text{H}_5\text{N-Cu}$  solution were placed in a quartz cell with a 10 mm pathlength; for film,  $\text{C}_2\text{H}_5\text{N-Cu}$  solution were evaporated to form solid films that were attached on a quartz substrate with 0.5 mm pathlength.

Thermal analysis of the  $\text{C}_2\text{H}_5\text{N-Cu}$  network was conducted using TA Instruments DSC Q-100. The calibration was carried out using indium and sapphire standards. Heating and cooling rates of  $10\text{ }^\circ\text{C}/\text{min}$  were used over the studied temperature range of  $-80\text{ }^\circ\text{C}$ - $60\text{ }^\circ\text{C}$ .

Microscopic attenuated total reflectance Fourier transform infrared ( $\mu\text{ATR FT-IR}$ ) spectra were obtained using a Bio-Rad FTS-6000 FTIR single-beam spectrometer at  $4\text{ cm}^{-1}$  resolution. A 2 mm Ge crystal, with a  $45^\circ$  face angle maintaining constant contact pressure between crystal and specimens was used. All spectra were corrected for spectral distortions and optical effects using

Urban-Huang algorithm<sup>[5]</sup>.

Internal reflection infrared (IRIR) images were obtained using a Bio-Rad FTS 7000 Stingray system equipped with internal reflection IR imaging (IRIRI) providing 1 micron spatial resolution. This system consists of a Bio-Rad FTS 7000 spectrometer, a Varian 600 UMA microscope, an image IR focal plane array (FPA) image detector, and internal reflection IR imaging. IR images were collected using the following spectral acquisition parameters: under sampling ratio 2, rapid-scan speed 5Hz, number of images per step 64, and spectral resolution 4  $\text{cm}^{-1}$ . In a typical experiment, spectral data set acquisition time was 1 min and image processing was performed using ENVI software (The Environment for Visualizing Images, Research Systems, Inc.) v. 3.5.

Raman spectra were obtained using a Renishaw Raman microscope equipped with a computer controlled three-axis encoded (X, Y, Z) motorized stage, a RenCam CCD detector, and a Leica microscope (DMLM series). The 785 nm diode laser provided an excitation source with a maximum power output of 300 mW. The films were placed on the gold surface and each Raman spectrum was collected at a 100 mW laser power and an acquisition time of 10 sec.

Figure S1 illustrates optical images of mechanically damaged  $C_2H_5N$ -Cu supramolecular polymer networks with the  $C_2H_5N$ :Cu molar ratio of 60 (Specimen B of Figure 3 in the main document). As seen, longer exposure times results in complete self-healing.

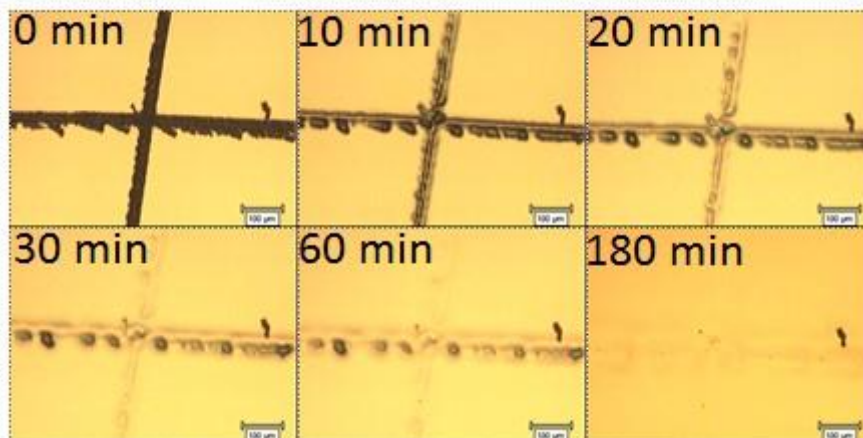

**Figure S1.** Optical images of mechanically damaged  $C_2H_5N$ -Cu supramolecular polymer networks with the  $C_2H_5N$ :Cu molar ratio of 60 (Specimen B of Figure 3 in the main document).

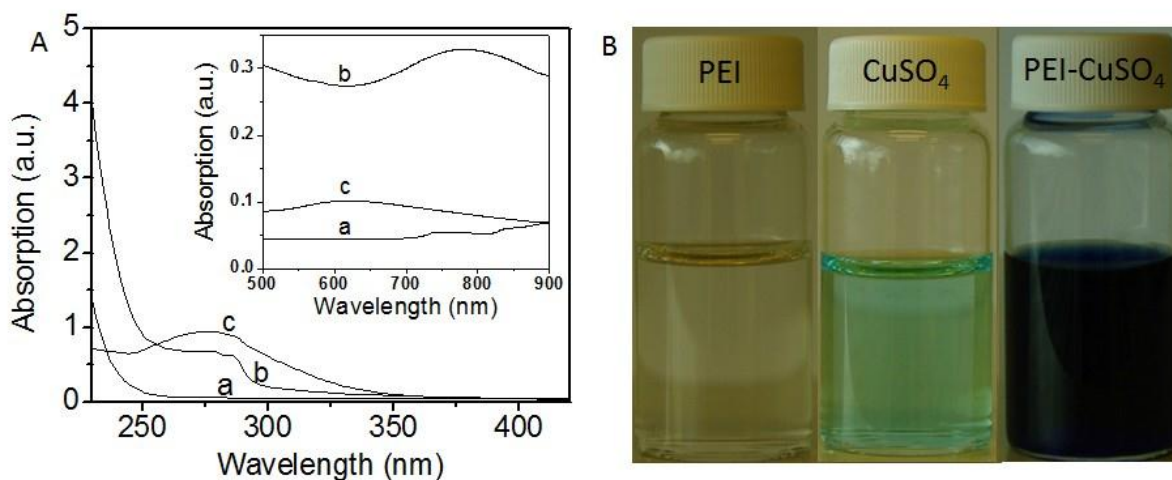

**Figure S2** UV-Vis absorption spectra (A) and optical images (B) of PEI (a),  $CuSO_4$  (b), and  $C_2H_5N$ -Cu complex networks (c).

Figure S2, A illustrate absorption spectra of PEI (a),  $CuSO_4$  (b) and  $C_2H_5N$ -Cu (c) in water. Pure PEI has no absorption bands in UV-Vis region (trace a); it is a colorless substance (Figure S2-B).  $CuSO_4$  water solution has two absorption band at 277 and 789 nm (Figure S2, A-b); blue-green

solution (Figure S2-B). Trace c of Figure S2, A illustrates UV-Vis spectra of  $C_2H_5N-Cu$  solution, with two absorption bands at 274 nm and 626 nm; deep blue color (Figure S2-B). The shift of the absorption band is induced by bonding  $\sigma(N) \rightarrow$ antibonding  $d_{x^2-y^2}(Cu)$  charge transfer.<sup>[6]</sup> These observations confirms formation of  $C_2H_5N-Cu$  complexes.

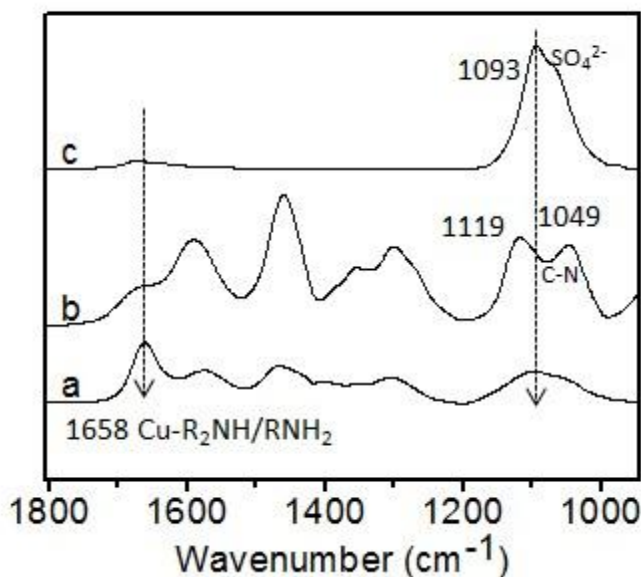

**Figure S3** ATR-FTIR spectra of  $CuSO_4$  (a), PEI (b) and  $C_2H_5N-Cu$  supramolecular polymer networks (c).

Figure S3 illustrates ATR-FTIR spectra of  $CuSO_4$  (a), PEI (b) and  $C_2H_5N-Cu$  supramolecular polymer networks (c). The bands at 1093, 1049 and 1119  $cm^{-1}$  in Trace a and b due to the stretching vibration of S-O and C-N bonds exhibit overlap in trace c. The 1658  $cm^{-1}$  band due to associated N-H vibrations increases significantly upon  $C_2H_5N-Cu$  complex formation. These observations confirm the formation of  $C_2H_5N-Cu$  complex networks.

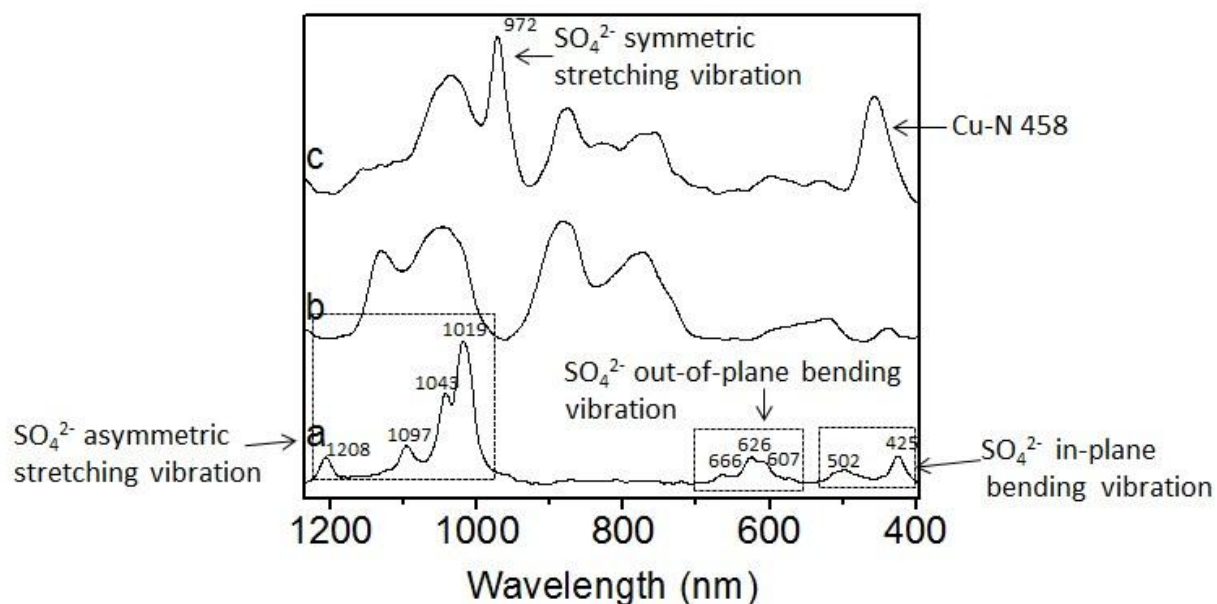

**Figure S4** Raman spectra of  $\text{CuSO}_4$  (a), PEI (b) and  $\text{C}_2\text{H}_5\text{N-Cu}$  supramolecular polymer networks (c).

Figure S4 shows Raman spectra of  $\text{CuSO}_4$  (a), PEI (b) and  $\text{C}_2\text{H}_5\text{N-Cu}$  supramolecular polymer networks (c).  $\text{CuSO}_4$  (trace a) exhibits asymmetric stretching vibrations at 1208, 1097, 1043, and 1019  $\text{cm}^{-1}$ , out-of-plane bending vibrations at 666, 626, and 607  $\text{cm}^{-1}$ , and in-plane bending vibrations at 502 and 425  $\text{cm}^{-1}$ .<sup>[3]</sup> When  $\text{C}_2\text{H}_5\text{N-Cu}$  complexes are formed, only symmetric stretching vibrations at 972  $\text{cm}^{-1}$  corresponding to S-O are observed<sup>[4]</sup>, indicating that all of  $\text{Cu}^{2+}$  are coordinated with amine groups of PEI. The new band at 458  $\text{cm}^{-1}$  is attributed to Cu-N coordination bonds<sup>[2]</sup>, further confirming formation of coordinated supramolecular polymer network.

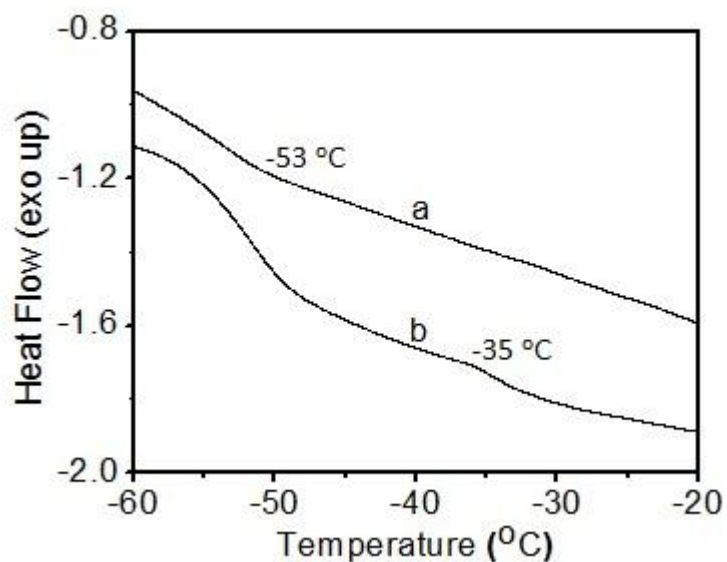

**Figure S5** Modulated differential scanning calorimetry (MDSC) of PEI (a) and C<sub>2</sub>H<sub>5</sub>N-Cu supramolecular polymer networks (b).

Figure S5 illustrates modulated differential scanning calorimetry (MDSC) thermograms of PEI (a) and C<sub>2</sub>H<sub>5</sub>N-Cu supramolecular polymer networks (b). When CuSO<sub>4</sub> is added to PEI, T<sub>g</sub> of PEI increases from -53 to -35 °C, thus indicating formation of the C<sub>2</sub>H<sub>5</sub>N-Cu supramolecular polymer network.

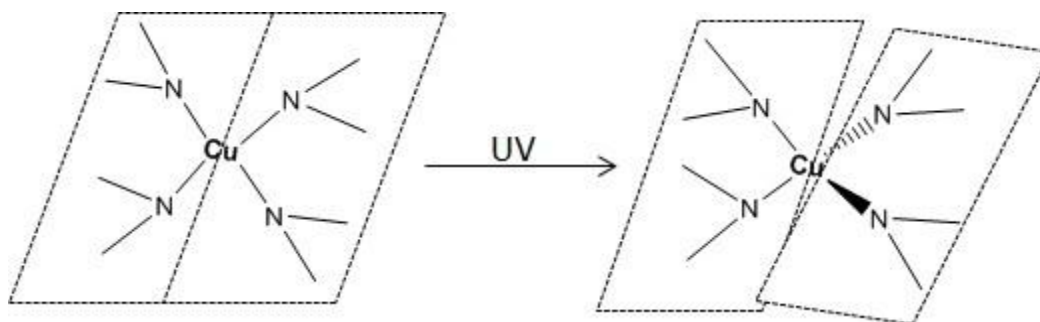

**Figure S6** Square-planar and tetrahedral configurations for  $C_2H_5N-Cu$  complexes formed in  $C_2H_5N-Cu$  supramolecular polymer networks

Figure S6 shows two configurations of  $C_2H_5N-Cu$  complex. Upon UV exposure, the  $C_2H_5N-Cu$  coordination geometry undergoes square-planar to tetrahedral configuration changes with large atomic movements and backbone alkyl group distortion, which results in volume changes<sup>[7]</sup>.



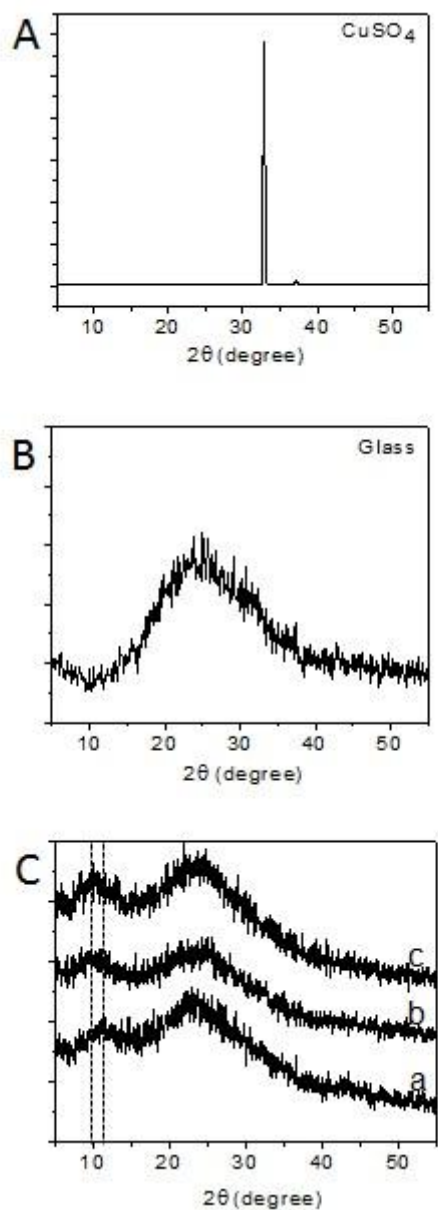

**Figure S7** X-ray diffraction patterns of CuSO<sub>4</sub> (A), glass substrate (B) and damaged C<sub>2</sub>H<sub>5</sub>N-Cu supramolecular polymer networks (C) as a function of UV exposure. a) 0 h; b) 1 h; c) 3 h.

Figure S7, A and B, illustrate X-ray diffraction patterns of CuSO<sub>4</sub> and glass substrate, respectively. CuSO<sub>4</sub> exhibits a diffraction peak at  $2\theta = 32.8^\circ$ , while glass substrate has a broad diffraction at  $2\theta = 24.6^\circ$ . X-ray diffraction patterns of damaged C<sub>2</sub>H<sub>5</sub>N-Cu supramolecular networks as a function of UV exposure are shown in Figure S7, C. Because of Cu-N

coordination, no diffraction peaks due to pure  $\text{CuSO}_4$  are detected, thus supporting Raman data shown in Figure S4. Reflections at  $2\theta = 11.2^\circ$  confirm the formation of  $\text{C}_2\text{H}_5\text{N-Cu}$  supramolecular networks.<sup>[5]</sup> With the increased UV exposure,  $2\theta$  at  $11.2^\circ$  shifts to  $10.1^\circ$ , indicating configuration changes from a square-planar to distorted tetrahedral geometry<sup>[8]</sup>. This configuration change results in unit cell expansion and volume increase, reflected by a gradual  $11.2^\circ$  peak shift towards lower angles<sup>[9]</sup> (Figure S7, C).

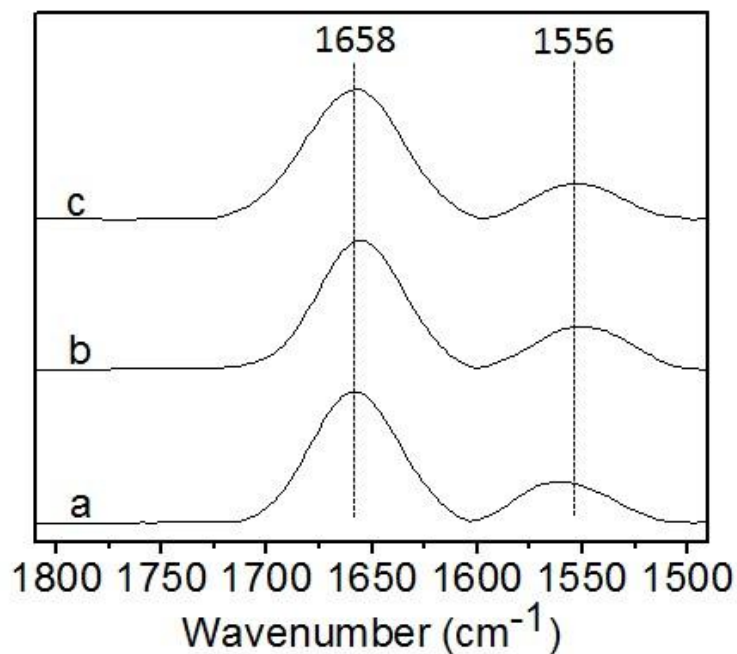

**Figure S8** ATR-FTIR spectra of undamaged C<sub>2</sub>H<sub>5</sub>N-Cu supramolecular polymer networks as a function of UV exposure time: a) 0 h; b) 1 h; c) 3 h.

Figure S8 illustrates ATR-FTIR spectra of undamaged C<sub>2</sub>H<sub>5</sub>N-Cu supramolecular polymer networks as a function of UV exposure. With the increased UV exposure time, undamaged C<sub>2</sub>H<sub>5</sub>N-Cu networks show no spectral changes, indicating that only damaged areas are affected by UV exposure.

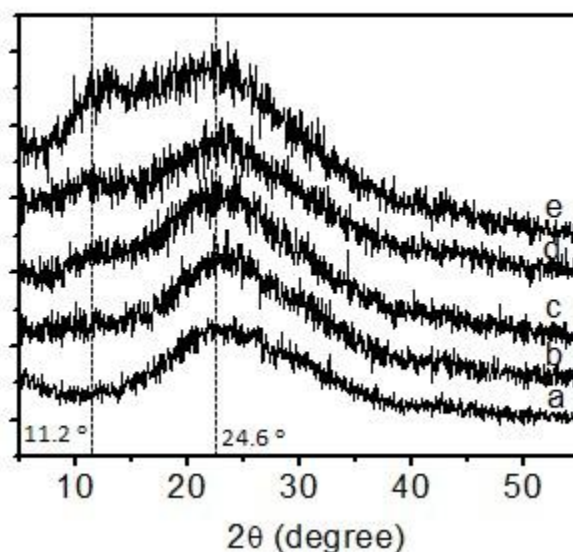

**Figure S9** X-ray diffraction patterns of the C<sub>2</sub>H<sub>5</sub>N-Cu supramolecular polymer networks. a, C<sub>2</sub>H<sub>5</sub>N:Cu = 80; b, C<sub>2</sub>H<sub>5</sub>N:Cu = 60; c, C<sub>2</sub>H<sub>5</sub>N:Cu = 40; d, C<sub>2</sub>H<sub>5</sub>N:Cu = 30; e, C<sub>2</sub>H<sub>5</sub>N:Cu = 20.

Figure S9 shows X-Ray diffraction of C<sub>2</sub>H<sub>5</sub>N-Cu supramolecular polymer networks with the following C<sub>2</sub>H<sub>5</sub>N-Cu molar ratios: 80 (a), 60 (b), 40 (c), 30 (d), 20 (e). Intensity of the diffraction peaks at 2θ=11.2° increases with the decreased C<sub>2</sub>H<sub>5</sub>N-Cu molar ratio, demonstrating that more C<sub>2</sub>H<sub>5</sub>N-Cu complexes are formed at lower C<sub>2</sub>H<sub>5</sub>N-Cu molar ratio. Cross-linking degree of this C<sub>2</sub>H<sub>5</sub>N-Cu supramolecular polymer networks depends on the content of C<sub>2</sub>H<sub>5</sub>N-Cu coordination, therefore the network cross-linking density increases with the decreased C<sub>2</sub>H<sub>5</sub>N-Cu molar ratio.

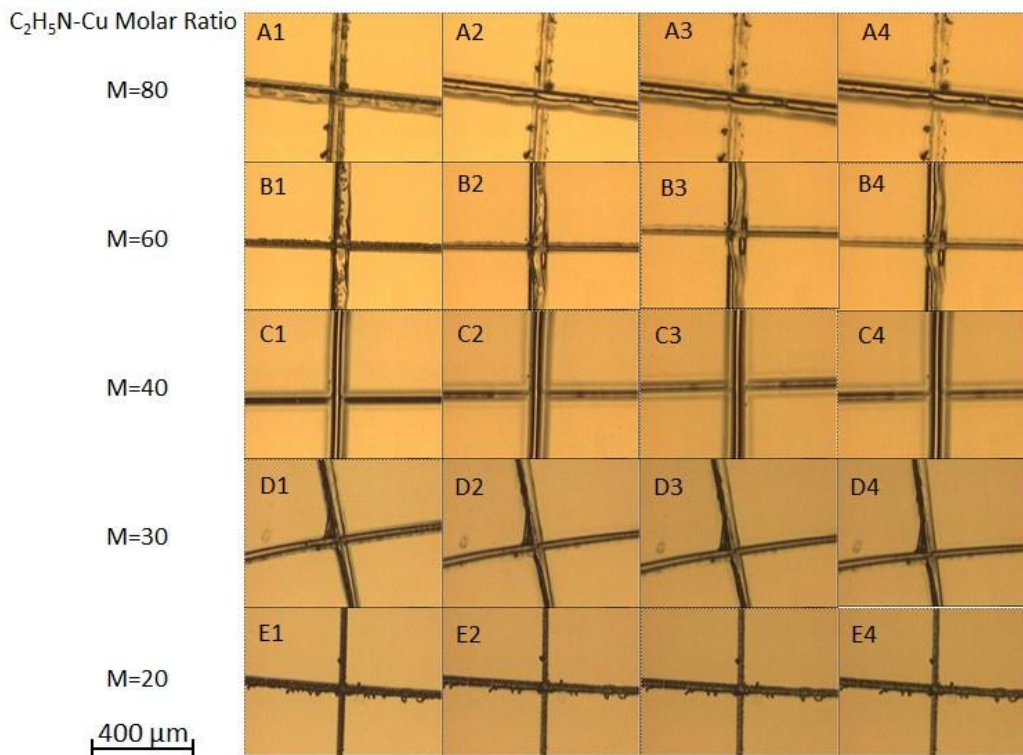

**Figure S10** Optical images of mechanically damaged  $C_2H_5N-Cu$  supramolecular polymer networks. A1, A2, A3 and A4 are optical images heated at  $50\text{ }^\circ\text{C}$  for 0, 6, 24 and 48 hrs ( $C_2H_5N:Cu = 80$ ); B1, B2, B3 and B4 are optical images heated at  $50\text{ }^\circ\text{C}$  for 0, 6, 24 and 48 hrs ( $C_2H_5N:Cu = 60$ ); C1, C2, C3 and C4 are optical images heated at  $50\text{ }^\circ\text{C}$  for 0, 6, 24 and 48 hrs ( $C_2H_5N:Cu = 40$ ); D1, D2, D3 and D4 are optical images heated at  $50\text{ }^\circ\text{C}$  for 0, 6, 24 and 48 hrs ( $C_2H_5N:Cu = 30$ ); E1, E2, E3 and E4 are optical images heated at  $50\text{ }^\circ\text{C}$  for 0, 6, 24 and 48 hrs ( $C_2H_5N:Cu = 20$ ).

Figure S10 illustrates self-healing behavior of mechanically damaged  $C_2H_5N-Cu$  supramolecular polymer networks with the following  $C_2H_5N:Cu$  molar ratios at  $50\text{ }^\circ\text{C}$ : 80 (A1-A4), 60 (B1-B4), 40 (C1-C4), 30 (D1-D4), 20 (E1-E4). At this temperature, all of the  $C_2H_5N-Cu$  supramolecular polymer networks can not be repaired. Since the actual sample temperature is  $\sim 30\text{ }^\circ\text{C}$  after UV exposure, the self-healing is not caused by heat but activation of the Cu-N coordination bonds.

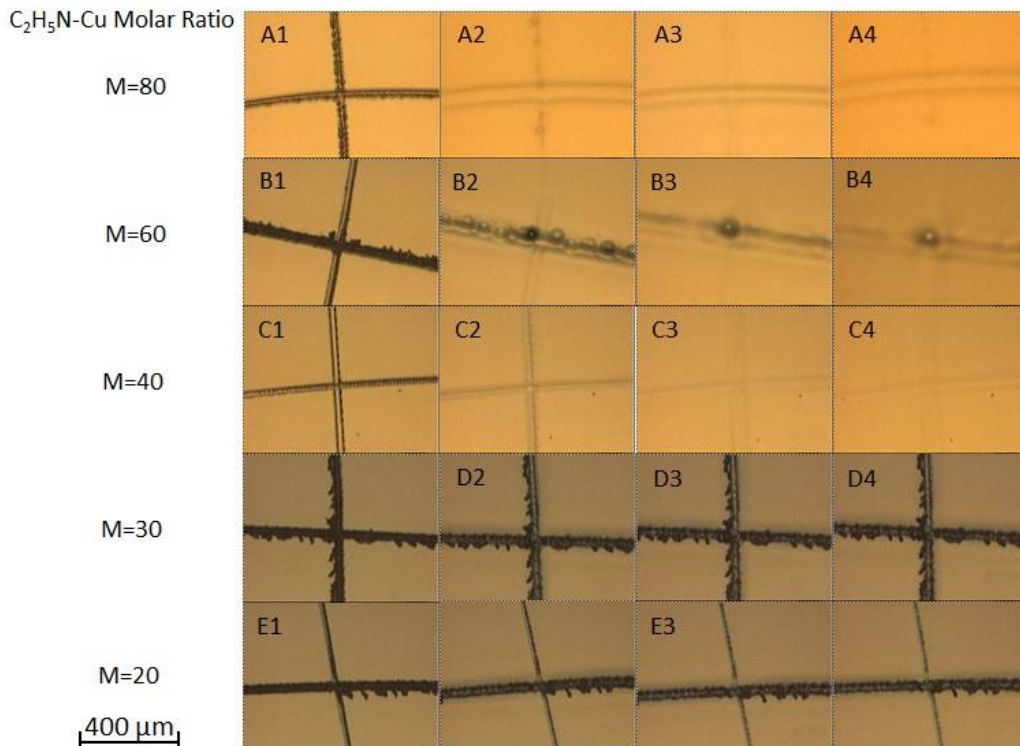

**Figure S11** Optical images of mechanically damaged  $C_2H_5N-Cu$  supramolecular polymer networks. A1, A2, A3 and A4 are optical images heated at  $75\text{ }^\circ\text{C}$  for 0, 6, 24 and 48 hrs ( $C_2H_5N:Cu = 80$ ); B1, B2, B3 and B4 are optical images heated at  $75\text{ }^\circ\text{C}$  for 0, 6, 24 and 48 hrs ( $C_2H_5N:Cu = 60$ ); C1, C2, C3 and C4 are optical images heated at  $75\text{ }^\circ\text{C}$  for 0, 6, 24 and 48 hrs ( $C_2H_5N:Cu = 40$ ); D1, D2, D3 and D4 are optical images heated at  $75\text{ }^\circ\text{C}$  for 0, 6, 24 and 48 hrs ( $C_2H_5N:Cu = 30$ ); E1, E2, E3 and E4 are optical images heated at  $75\text{ }^\circ\text{C}$  for 0, 6, 24 and 48 hrs ( $C_2H_5N:Cu = 20$ ).

Figure S11 illustrates self-healing behavior of the mechanically damaged  $C_2H_5N-Cu$  supramolecular polymer networks with the following  $C_2H_5N:Cu$  molar ratios at  $75\text{ }^\circ\text{C}$ : 80 (A1-A4), 60 (B1-B4), 40 (C1-C4), 30 (D1-D4), 20 (E1-E4). At this temperature, only low cross-linked films ( $C_2H_5N-Cu$  molar ratio  $\geq 40$ ) can be repaired, which also identifies that the self-healing upon UV exposure is not caused by heat but activation of the Cu-N coordination bonds.

## References

1. a) T. D. Perrine, W. R. Landis, *J. Polym. Sci., Part A: Polym. Chem.* **1967**, *5*, 1993-2003. b) F. Ungaro, G. D. Rosa, A. Miro, F. Quaglia, *J. Pharm. Biomed. Anal.* **2003**, *31*, 143-149.
2. D. Michalska, K. Hernik, R. Wysokinski, B. Morzyk-Ociepa, A. Pietraszko, *Polyhedron* **2007**, *26*, 4303-4313.
3. R. L. Frost, *J Raman Spectroc*, **2011**, *42*, 1130-1134.
4. P. Drozdowski, H. Zaslona, M. Kubiak, *Struct. Chem.*, **2010**, *21*, 405-414.
5. M. W. Urban, *Attenuated Total Reflectance Spectroscopy of Polymers; Theory and Applications. American Chemical Society and Oxford University Press, Washington, DC, 1996.*
6. Z. Koziskova, J. Gazo. *Chem Zvesti.* **1984**, *38*, 583.
7. I. Grenthe, P. Paoletti, M. Sandstrom, S. Glikberg. *Inorg. Chem.* **1979**, *18*, 2687.
8. K. Takahashi, R. Nakajima, Z. Gu, H. Yoshiki, A. Fujishima, O. Sato. *Chem Commun*, **2002**, *38*, 1578-1579.
9. P. Naumov, K. Sakurai. *Chem. Phys. Lett.* **2006**, *427*, 343-345.
